# Supplementary material for: MACC1-Dependent Antitumor Effect of Curcumin in Colorectal Cancer
Source: MDPI journal article supplement (doi:10.3390/nu14224792), 2022-11-12
Supplement: s1 [file s1]

Supplementary Table S1: Primers used for RT-qPCR

| Gene  | Primer | Sequence                          |
|-------|--------|-----------------------------------|
| MACC1 | Fwd    | 5'-TTC TTT TGA TTC CTC CGG TGA-3' |
|       | Rev    | 5'-ACT CTG ATG GGC ATG TGC TG-3'  |
| GAPDH | Fwd    | 5'-GTCTCCTCTGACTTCAACAGCG-3'      |
|       | Rev    | 5'-ACCACCCTGTTGCTGTAGCCAA-3'      |

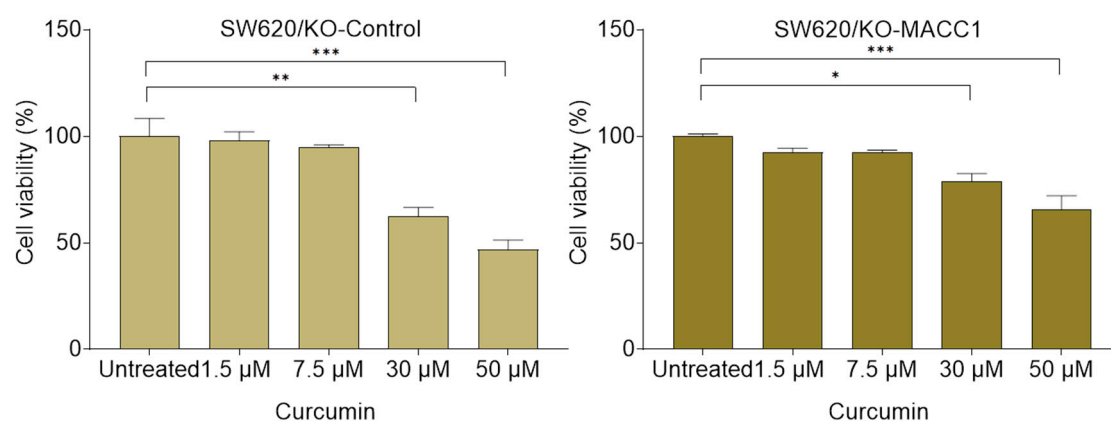

**Supplementary Figure S1: Curcumin reduced viability of SW620 cells after 48 h.** CRC cells were treated with various concentrations of curcumin. Cell viability has been further determined using the MTT assay. Viability of the CRC cells was reduced upon 48 h curcumin treatment in a dose-dependent manner. Data represent mean  $\pm$  SEM ( $n \geq 3$ ),  $*=p < 0.05$ ,  $**=p < 0.01$   $***=p < 0.001$
